# Supplementary material for: Selectivity and specificity of small molecule fluorescent dyes/probes used for the detection of Zn2+and Ca2+in cells
Source: Royal Society of Chemistry journal article supplement (doi:10.1039/c3mt00283g), 2013-11-28
Supplement: c3mt00283g.pdf [file c3mt00283g.pdf]

## Supplementary Information

### SELECTIVITY AND SPECIFICITY OF SMALL MOLECULE FLUORESCENT DYES/PROBES USED FOR THE DETECTION OF Zn<sup>2+</sup> AND Ca<sup>2+</sup> IN CELLS

Julio A. Landero-Figueroa, Kavitha Subramanian Vignesh, George Deepe, and Joseph Caruso

**Table S1 -proteins found in the 20 min SEC-ICPMS fraction**

| Protein description                                          | MASCOT protein score |
|--------------------------------------------------------------|----------------------|
| Actin, cytoplasmic 1                                         | 235                  |
| Pyruvate kinase isozymes M1/M2                               | 207                  |
| Peroxiredoxin-1 OS=Mus musculus                              | 179                  |
| 78 kDa glucose-regulated protein                             | 161                  |
| gamma actin-like protein [Mus musculus]                      | 157                  |
| unnamed protein product [Mus musculus]                       | 157                  |
| Plastin-2 OS=Mus musculus                                    | 149                  |
| Synaptic vesicle membrane protein VAT-1                      | 147                  |
| histone H2B type 3-A [Mus musculus]                          | 136                  |
| Annexin A1 OS=Mus musculus                                   | 128                  |
| Alpha-enolase OS=Mus musculus                                | 123                  |
| Glyceraldehyde-3-phosphate dehydrogenase OS=Mus              | 120                  |
| Vimentin OS=Mus musculus                                     | 119                  |
| glyceraldehyde-3-phosphate dehydrogenase [Mus musculus]      | 116                  |
| peptidyl-prolyl cis-trans isomerase A [Mus musculus]         | 116                  |
| Ras-related protein Rab-7a OS=Mus musculus                   | 113                  |
| unnamed protein product [Mus musculus]                       | 112                  |
| heat shock protein 65 [Mus musculus]                         | 110                  |
| alpha-fetoprotein [Mus musculus]                             | 108                  |
| spermatid-specific [Mus musculus]                            | 107                  |
| unnamed protein product [Mus musculus]                       | 106                  |
| Beta-actin-like protein 2 OS=Mus musculus                    | 105                  |
| malate dehydrogenase, mitochondrial precursor [Mus musculus] | 103                  |
| Transgelin-2 OS=Mus musculus                                 | 102                  |
| Beta-enolase OS=Mus musculus                                 | 98                   |
| alpha-actin (aa 40-375) [Mus musculus]                       | 96                   |
| ATP synthase beta-subunit [Mus musculus]                     | 96                   |
| Atp5b protein [Mus musculus]                                 | 94                   |
| Moesin OS=Mus musculus                                       | 89                   |
| histone H2A [Mus musculus domesticus]                        | 88                   |
| unnamed protein product [Mus musculus]                       | 88                   |
| Heat shock cognate 71 kDa protein OS=Mus musculus            | 87                   |
| <b>Metallothionein-2 [Mus musculus]</b>                      | <b>86</b>            |

|                                                                    |    |
|--------------------------------------------------------------------|----|
| 78 kDa glucose-regulated protein [Mus musculus]                    | 84 |
| Macrophage-capping protein OS=Mus                                  | 84 |
| pyruvate kinase M [Mus musculus]                                   | 81 |
| histone H1.2 [Mus musculus]                                        | 80 |
| Heat shock protein HSP 90-beta OS=Mus musculus 2                   | 79 |
| Sulfated glycoprotein 1 OS=Mus musculus                            | 78 |
| Tubulin beta-3 chain OS=Mus musculus                               | 74 |
| profilin-1 [Mus musculus]                                          | 72 |
| unnamed protein product [Mus musculus]                             | 71 |
| Myc basic motif homologue-1 [Mus musculus]                         | 69 |
| uncharacterized protein LOC433182 [Mus musculus]                   | 69 |
| unnamed protein product [Mus musculus]                             | 69 |
| 40S ribosomal protein S5 [Mus musculus]                            | 68 |
| mCG15232, isoform CRA_b [Mus musculus]                             | 68 |
| Tubulin beta-5 chain OS=Mus musculus                               | 67 |
| Cathepsin B OS=Mus musculus                                        | 66 |
| TI-225 [Mus musculus]                                              | 66 |
| malate dehydrogenase, mitochondrial precursor [Mus musculus]       | 65 |
| PREDICTED: ubiquitin-like protein ISG15-like [Mus musculus]        | 64 |
| Tubulin beta-2A chain OS=Mus musculus                              | 64 |
| unnamed protein product [Mus musculus]                             | 64 |
| L-lactate dehydrogenase A chain isoform 1 [Mus musculus]           | 63 |
| Annexin A4 OS=Mus musculus                                         | 60 |
| Glyceraldehyde-3-phosphate dehydrogenase-like [Mus musculus]       | 60 |
| unnamed protein product [Mus musculus]                             | 59 |
| ADP/ATP translocase 2 OS=Mus musculus 3                            | 58 |
| histone H2A.J [Mus musculus]                                       | 58 |
| Annexin A5 OS=Mus musculus                                         | 55 |
| Heat shock protein 75 kDa, mitochondrial OS=Mus musculus           | 55 |
| unnamed protein product [Mus musculus]                             | 55 |
| Rho family GTPase [Mus musculus]                                   | 52 |
| fetuin [Mus musculus]                                              | 51 |
| Full=Galectin-3                                                    | 51 |
| unnamed protein product [Mus musculus]                             | 51 |
| 65-kDa macrophage protein [Mus musculus]                           | 50 |
| RNA-binding protein FUS OS=Mus musculus                            | 50 |
| unnamed protein product [Mus musculus]                             | 50 |
| unnamed protein product [Mus musculus]                             | 50 |
| mCG1036674 [Mus musculus]                                          | 49 |
| Stress-70 protein, mitochondrial OS=Mus musculus                   | 49 |
| tubulin beta-5 chain [Mus musculus]                                | 49 |
| Twinfilin-1 OS=Mus musculus                                        | 49 |
| unnamed protein product [Mus musculus]                             | 49 |
| unnamed protein product [Mus musculus]                             | 49 |
| V-type proton ATPase subunit B, brain isoform OS=Mus               | 49 |
| ATP synthase subunit alpha, mitochondrial precursor [Mus musculus] | 48 |

|                                                              |    |
|--------------------------------------------------------------|----|
| endoplasmin [Mus musculus]                                   | 48 |
| putative transmembrane glycoprotein [Mus musculus]           | 48 |
| Transketolase OS=Mus musculus                                | 48 |
| Galectin-3 OS=Mus musculus                                   | 47 |
| peroxiredoxin-4 precursor [Mus musculus]                     | 47 |
| unnamed protein product [Mus musculus]                       | 47 |
| ATP synthase subunit alpha, mitochondrial OS=Mus musculus    | 46 |
| Macrophage scavenger receptor types I and II OS=Mus musculus | 46 |
| Fructose-bisphosphate aldolase A OS=Mus                      | 45 |
| Gamma-enolase OS=Mus musculus                                | 44 |
| Tropomyosin alpha-4 chain OS=Mus musculus                    | 43 |
| Aldehyde dehydrogenase, mitochondrial OS=Mus                 | 42 |
| Coiled-coil domain-containing protein 38 OS=Mus musculus     | 41 |
| Cathepsin S OS=Mus musculus GN=Ctss PE=2 SV=1                | 39 |
| 40S ribosomal protein S8 OS=Mus musculus                     | 38 |
| Lysosome-associated membrane glycoprotein 1 OS=Mus           | 37 |

### Supplementary Figure S1: Negative, unstained BMC control

(a) SEC-FL and SEC-ICP-MS chromatograms of unstained BMC lysates; Fe, Cu, Zn, Ca and Ni represented by solid lines belong to the left Y axis, while the SEC-FL signal represented by the black line corresponds to the right Y axis; no SEC-FL signal is observed in the unstained control; (b) UV-Vis emission isoplot of unstained BMCs, color scale represents emission intensity.

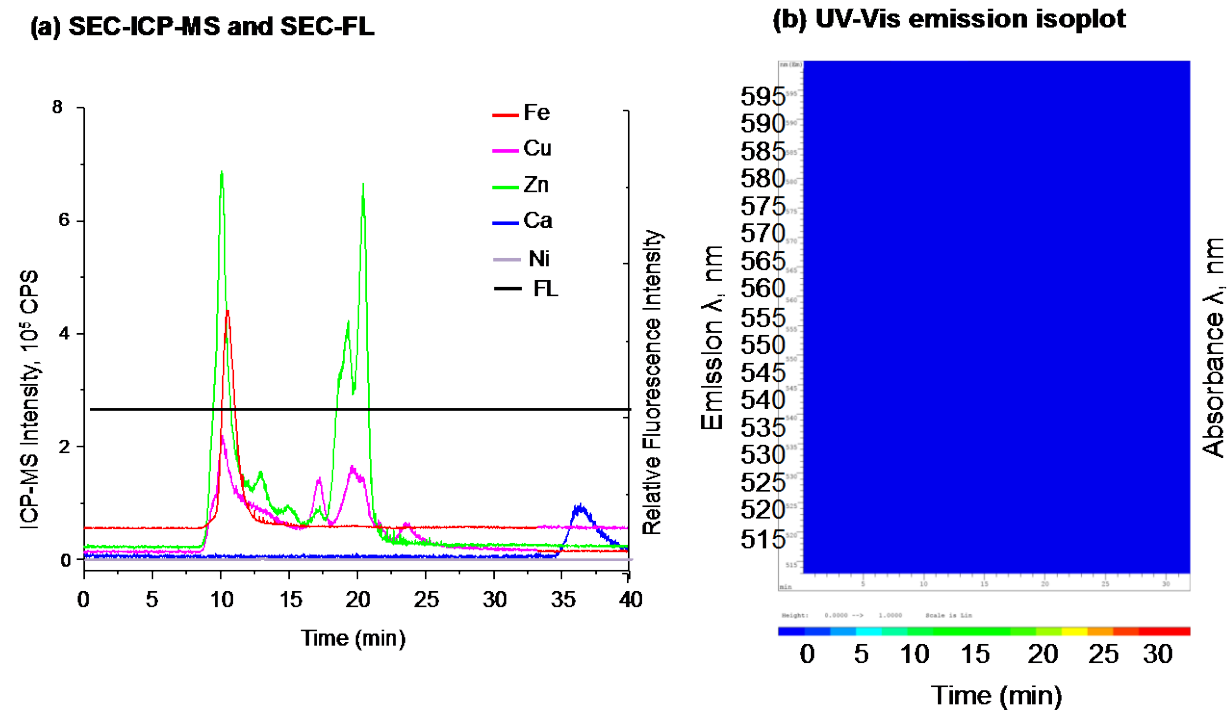

## Supplementary Figure S2: MS/MS of CSQGICKEASDK – MT2

Figure S2 -MS/MS of CSQGICKEASDK - MT2

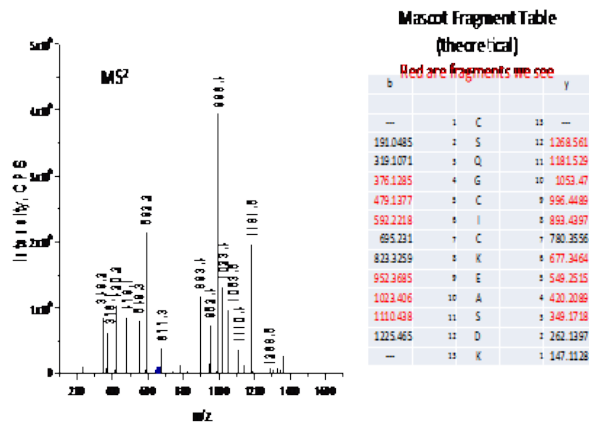

Figure S2 -MS/MS of CSQGICKEASDK - MT2

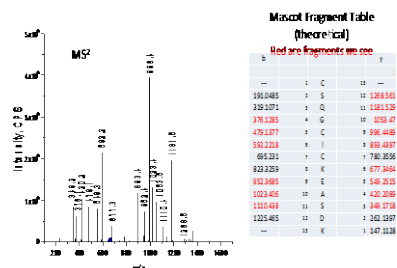

Fragments observed are in red.
